# Supplementary material for: A Life Dedicated to Climbing and Its Sequelae in the Fingers—A Review of the Literature
Source: MDPI journal article supplement (doi:10.3390/ijerph192417050), 2022-12-19
Supplement: s1 [file s1]

**Study questionnaire: Risk of Osteoarthritis in Performance Sport climbers**

Name: \_\_\_\_\_

Surname: \_\_\_\_\_

Date of birth: \_\_\_\_\_

Height: \_\_\_\_\_ m

Weight: \_\_\_\_\_ kg

Profession: \_\_\_\_\_

Hand-Dominance: Right / Left

When did you start climbing?

Age: \_\_\_\_\_

How long have you been climbing? (Keyword interruptions)

Years: \_\_\_\_\_

**Current training**

How often do you train per week? \_\_\_\_\_ h/week

How many hours per week do you climb? \_\_\_\_\_ h/week

How many hours per week do you boulder? \_\_\_\_\_ h/week

**Training behavior over the career**

How has the training pattern/week changed during your career?

5 - 10 years of age: \_\_\_\_\_ h/week

11 - 20 years of age: \_\_\_\_\_ h/week

21 - 30 years of age: \_\_\_\_\_ h/week

31 - 40 years of age: \_\_\_\_\_ h/week

41 - 50 years of age: \_\_\_\_\_ h/week

51 - 60 years of age: \_\_\_\_\_ h/week

**Best performance**

What was your most difficult route redpoint? \_\_\_\_\_

What was your most difficult on sight? \_\_\_\_\_

What was your most difficult boulder redpoint? \_\_\_\_\_

**Current climbing performance**

route redpoint? \_\_\_\_\_

on sight? \_\_\_\_\_

boulder redpoint? \_\_\_\_\_

### **Climbing level over the career**

1.) International elite level (UIAA >XI or >9a), Boulder Fb >8b:

(In years): \_\_\_\_\_ Years of life from to. : \_\_\_\_\_

2.) Elite level (UIAA X+ - XI- or 8b - 8c+), Boulder Fb 7c+ - 8a+:

(In years): \_\_\_\_\_ Years of life from to. : \_\_\_\_\_

3.) Experienced level (UIAA IX- - X or 7b - 8b), Boulder Fb 7a - 7c:

(In years): \_\_\_\_\_ Years of life from to. : \_\_\_\_\_

4.) Intermediate level (UIAA VII- - VIII+ or 6b+ - 7a+), Boulder Fb 6a - 6c+:

(In years): \_\_\_\_\_ Years of life from to. : \_\_\_\_\_

### **Diseases**

Do you have any disease? ☐ yes ☐ no

? \_\_\_\_\_

### **Medication**

Take medication regularly? ☐ yes ☐ no

If yes, which? \_\_\_\_\_

### **Finger pain**

Have you had pain in your fingers in the last 6 months? ☐ yes ☐ no

Which fingers exactly?

\_\_\_\_\_

Have you had pain in your fingers during climbing in the last 6 months? ☐ yes ☐ no

Which fingers exactly?

\_\_\_\_\_

Have you had pain in your fingers at rest in the last 6 months? ☐ yes ☐ no

Which fingers exactly?

\_\_\_\_\_

Have you ever had an acute injury to the fingers? ☐ yes ☐ no

Which fingers exactly?

\_\_\_\_\_

Have you ever had a chronic injury to your fingers? ☐ yes ☐ no

Which fingers exactly?

---

How long did you have this pain (in years): \_\_\_\_\_ years

Have you ever had surgery on your fingers? ☐ yes ☐ no

Which fingers exactly?

---

Which surgery exactly?

---

### **Morning finger stiffness**

Have you had stiffness in your fingers in the last 6 months? ☐ yes ☐ no

Which fingers exactly?

---
